# Supplementary material
Source: Elsevier journal article supplement (https://www.sciencedirect.com/science/article/pii/S0213911113001362)
Supplement: mmc1 [file S0213911113001362:mmc1.docx]

Tabla I. Participantes del II Taller sobre contenidos salud pública en los programas de grado

| Participantes Universidad | |
| --- | --- |
| Juan Miguel Fregeneda | Universidad de León |
| Antonio Sánchez López | Universidad de Murcia |
| María Belén Huerta Lorenzo | Universidad de Córdoba |
| Carmen Saiz Sánchez | Universitat de València |
| Manuel Conde Herrera | Universidad de Sevilla |
| Inmaculada Feilda Martínez | Universidad de Cádiz |
| Antonio Aguiló Pons | Universitat de les Illes Balears |
| Isabel Bayona Marzo | Universidad de Valladolid |
| María José Iglesias | Universidad de Zaragoza |
| Manuela García de la Hera | Universitat Miguel Hernández de Elche |
| Joan Paredes Carbonell | Universitat de València  Universidad Católica de Valencia San Vicente Mártir |
| Yolanda Valcárcel Rivera | Rey Juan Carlos |
| María Sala Serra | Universitat Autònoma de Barcelona |
| Juan Alguacil Ojeda | Huelva |
| Mª Carmen Davó  Carmen Vives Cases  Carlos Álvarez-Dardet  Maria Teresa Ruiz Cantero  Fernando García Benavides  Andreu Segura Benedicto | Universitat d Alacant  Universitat d Alacant  Universitat d Alacant  Universitat d Alacant  Universitat Pompeu Fabra  Universitat Pompeu Fabra |

Tabla II. Competencias profesionales de salud pública identificadas para los grados de Fisioterapia, terapia ocupacional, ciencias ambientales, odontología y veterinaria

| Función/ actividad/ competencia profesional | Gradosa | | | | |
| --- | --- | --- | --- | --- | --- |
| FISIO | T.OCU | C. AMB | ODON | VETER |
| FUNCIÓN: VALORAR LAS NECESIDADES DE SALUD DE LA POBLACIÓN |  |  |  |  |  |
| Actividad: Analizar la situación de salud de la comunidad |  |  |  |  |  |
| Competencias |  |  |  |  |  |
| 1. Identificar los factores condicionantes de la salud |  |  |  |  |  |
| 2. Interpretar procesos de salud y enfermedad ámbito de las poblaciones humanas |  |  |  |  |  |
| 3. Recoger, procesar y almacenar la información (demográfica y sanitaria) |  |  |  |  |  |
| 4. Valorar la calidad de la información |  |  |  |  |  |
| 5. Producir indicadores e índices sanitarios |  |  |  |  |  |
| 6. Analizar cualitativa y cuantitativamente los datos |  |  |  |  |  |
| 7. Analizar la distribución espacial y temporal de la información sanitaria |  |  |  |  |  |
| 8. Valorar la distribución de los riesgos ambientales, biológicos y culturales |  |  |  |  |  |
| 9. Valorar las desigualdades en salud |  |  |  |  |  |
| 10. Redactar y comunicar la información a diversas audiencias |  |  |  |  |  |
| Actividad: Describir y analizar la asociación e impacto de factores de riesgo, problemas de salud y el impacto de los servicios sanitarios |  |  |  |  |  |
| Competencias |  |  |  |  |  |
| 1. Generar hipótesis con base científica |  |  |  |  |  |
| 2. Diseñar propuestas de investigación apropiadas |  |  |  |  |  |
| 3. Manejar las técnicas epidemiológicas y estadísticas apropiadas |  |  |  |  |  |
| 4. Diseñar instrumentos de medidas y de recogida de datos |  |  |  |  |  |
| 5. Procesar y almacenar la información en bases de datos |  |  |  |  |  |
| 6. Evaluar la calidad de los datos |  |  |  |  |  |
| 7. Manejar las técnicas de investigación de servicios e intervenciones |  |  |  |  |  |
| 8. Aplicar técnicas de evaluación económica |  |  |  |  |  |
| 9. Sintetizar los resultados de manera apropiada |  |  |  |  |  |
| 10. Conocer bibliografía pertinente e identificar fuentes de información apropiadas |  |  |  |  |  |
| 11. Respetar aspectos éticos de la documentación e investigación sanitaria |  |  |  |  |  |
| Actividad: Controlar las enfermedades y las situaciones de emergencia |  |  |  |  |  |
| Competencias |  |  |  |  |  |
| 1. Verificar la existencia de una situación de emergencia sanitaria |  |  |  |  |  |
| 2. Analizar las causas de una situación de emergencia |  |  |  |  |  |
| 3. Conocer la eficacia y la seguridad de las medidas de control disponibles |  |  |  |  |  |
| 4. Conocer los recursos disponibles, su organización y responsabilidades |  |  |  |  |  |
| 5. Proponer medidas extraordinarias para la resolución de situaciones de emergencia |  |  |  |  |  |
| 6. Aplicar las medidas y los recursos disponibles |  |  |  |  |  |
| 7. Generar confianza y credibilidad |  |  |  |  |  |
| 8. Valorar las potenciales reacciones de la comunidad (percepción del riesgo) |  |  |  |  |  |
| 9. Comunicar población y profesionales información relevante en situación de crisis |  |  |  |  |  |

*(Continúa)*

|  | Gradosa | | | | |
| --- | --- | --- | --- | --- | --- |
| FISIO | T.OCU | C. AMB | ODON | VETER |
| FUNCIÓN: DESARROLLAR LAS POLÍTICAS DE SALUD |  |  |  |  |  |
| Actividad: Contribuir a definir la ordenación del sistema de salud |  |  |  |  |  |
| Competencias |  |  |  |  |  |
| 1. Utilizar información de problemas y necesidades de salud de la población |  |  |  |  |  |
| 2. Establecer las prioridades sanitarias de una población definida |  |  |  |  |  |
| 3. Formular objetivos de salud contrastables y medibles |  |  |  |  |  |
| 4. Conocer los diferentes sistemas de salud |  |  |  |  |  |
| 5. Conocer legislación sanitaria vigente y procesos de elaboración de normas |  |  |  |  |  |
| 6. Conocer los mecanismos de asignación de recursos sanitarios |  |  |  |  |  |
| 7. Evaluar impacto sanitario, económico y social de políticas salud, incluidas las intersectoriales |  |  |  |  |  |
| 8. Conocer los objetivos y las prioridades políticas en materia sanitaria |  |  |  |  |  |
| 9. Conocer políticas sanitarias europeas de organismos y agencias internacionales |  |  |  |  |  |
| Actividad: Fomentar la defensa de la salud en las políticas intersectoriales |  |  |  |  |  |
| Competencias |  |  |  |  |  |
| 1. Conocer objetivos y prioridades de políticas públicas relacionadas con salud |  |  |  |  |  |
| 2. Conocer legislación básica medioambiental, laboral, agrícola-ganadera, alimentaria relacionada con la salud |  |  |  |  |  |
| 3. Evaluar el impacto sanitario de las políticas públicas |  |  |  |  |  |
| 4. Negociar el papel de salud en la elaboración de políticas públicas relacionadas con la salud |  |  |  |  |  |
| 5. Movilizar y generar opinión pública en defensa de la salud |  |  |  |  |  |
| Actividad: Contribuir a diseñar y poner en marcha programas e intervenciones sanitarias |  |  |  |  |  |
| Competencias |  |  |  |  |  |
| 1. Identificar problemas, necesidades y desigualdades de salud de la población |  |  |  |  |  |
| 2. Establecer las prioridades sanitarias de una población definida |  |  |  |  |  |
| 3. Analizar beneficios y perjuicios potenciales de las intervenciones sanitarias |  |  |  |  |  |
| 4. Conocer las bases del comportamiento de las personas y grupos |  |  |  |  |  |
| 5. Diseñar programas de educación sanitaria |  |  |  |  |  |
| 6. Diseñar programas de vacunación de ámbito poblacional |  |  |  |  |  |
| 7. Diseñar programas de protección frente a los riesgos ambientales |  |  |  |  |  |
| 8. Diseñar programas de higiene y seguridad alimentaria |  |  |  |  |  |
| 9. Diseñar programas de prevención secundaria de alcance poblacional |  |  |  |  |  |
| 10. Valorar aspectos éticos de intervenciones sanitarias. Diseñar programas asistenciales y sociosanitarios |  |  |  |  |  |
| 11. Contribuir a la intersectorialidad de los programas |  |  |  |  |  |
| Actividad: Fomentar la participación social y fortalecer el grado de control de los ciudadanos sobre su propia salud |  |  |  |  |  |
| Competencias |  |  |  |  |  |
| 1. Preparar y proporcionar información a personas y grupos de diversa procedencia |  |  |  |  |  |
| 2. Facilitar y reforzar la capacidad de los ciudadanos sobre su propia salud |  |  |  |  |  |
| 3. Actuar en defensa de la salud de grupos vulnerables de la sociedad |  |  |  |  |  |
| 4. Identificar e implicar a líderes de la comunidad en la práctica de la salud pública |  |  |  |  |  |
| 5. Liderar y coordinar equipos humanos de procedencia diversa |  |  |  |  |  |

*(Continúa)*

|  | Gradosa | | | | |
| --- | --- | --- | --- | --- | --- |
| FISIO | T. OCU | C. AMB | ODON | VETER |
| FUNCIÓN: GARANTIZAR LA PRESTACIÓN DE SERVICIOS SANITARIOS. GESTIONAR SERVICIOS Y PROGRAMAS |  |  |  |  |  |
| Actividad: Gestionar servicios y programas |  |  |  |  |  |
| Competencias |  |  |  |  |  |
| 1. Facilitar la accesibilidad de los grupos vulnerables a los servicios de salud |  |  |  |  |  |
| 2. Implantar los programas de salud |  |  |  |  |  |
| 3. Elaborar presupuestos y preparar propuestas de financiación |  |  |  |  |  |
| 4. Identificar prioridades de salud en cualquier situación |  |  |  |  |  |
| 5. Gestionar equipos multidisciplinares y resolver situaciones de conflictos |  |  |  |  |  |
| Actividad: Evaluar servicios y programas |  |  |  |  |  |
| Competencias |  |  |  |  |  |
| 1. Evaluar la eficacia, la efectividad, la eficiencia, la utilidad, la seguridad, la equidad territorial, social, étnica o de género de las intervenciones sanitarias |  |  |  |  |  |
| 2. Analizar satisfacción población, profesionales y proveedores de servicios sanitarios |  |  |  |  |  |
| 3. Utilizar las medidas de estructura, proceso y resultados más apropiadas en cada caso, incluyendo calidad de vida, satisfacción, aceptación, etc. |  |  |  |  |  |
| 4. Saber aplicar los criterios establecidos para la acreditación de los servicios y actividades sanitarias |  |  |  |  |  |
| Actividad: Realizar inspecciones y auditorias sanitarias |  |  |  |  |  |
| Competencias |  |  |  |  |  |
| 1. Conocer la legislación vigente sobre los riesgos para la salud |  |  |  |  |  |
| 2. Conocer los mecanismos de acción de los principales riesgos para la salud |  |  |  |  |  |
| 3. Conocer las técnicas de auditoría y estar entrenados en ellas |  |  |  |  |  |
| 4. Conocer la legislación aplicable a cada área de actividad sometida a control sanitario |  |  |  |  |  |
| 5. Proponer y/o adoptar medidas especiales (decomisos, intervenciones cautelares, etc.) |  |  |  |  |  |
| 6. Proponer y realizar acciones conducentes a mejorar la prestación de servicios |  |  |  |  |  |
| Actividad: Elaborar guías y protocolos |  |  |  |  |  |
| Competencias |  |  |  |  |  |
| 1. Sintetizar el conocimiento actual disponible sobre el impacto de intervenciones sanitarias de interés |  |  |  |  |  |
| 2. Conocer procesos de elaboración de guías y protocolos normalizados de trabajo |  |  |  |  |  |
| 3. Adaptar las guías disponibles a entornos concretos |  |  |  |  |  |
| 4. Elaborar métodos y procedimientos normalizados de control |  |  |  |  |  |
| 5. Involucrar a los agentes más relevantes (asociaciones profesionales, expertos, representantes profesionales, etc.) en la elaboración y aplicación de las guías y protocolos |  |  |  |  |  |

*a. FISIO: fisioterapia; T.OCU: terapia ocupacional; C.AMB: ciencias ambientales; ODON: odontología; VETER: veterinaria*
